# Supplementary material for: Determining breast cancer histological grade from RNA-sequencing data
Source: Springer Nature journal article supplement (doi:10.1186/s13058-016-0710-8), 2016-05-10
Supplement: MOESM1 [file 10111830]

# Additional Figure 1

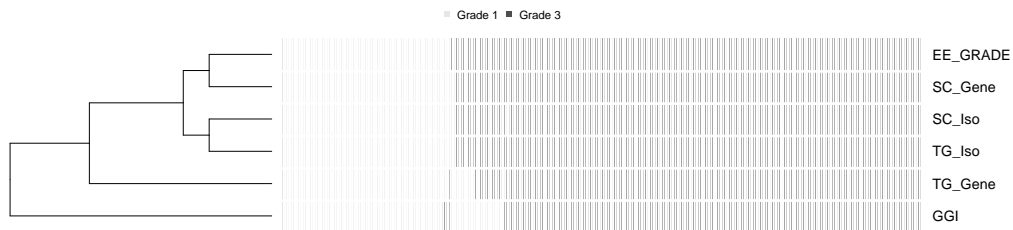

|             | GGI  | TG_Gene | TG_Iso | SC_Gene | SC_Iso |
|-------------|------|---------|--------|---------|--------|
| Sensitivity | 0.98 | 1.00    | 1.00   | 1.00    | 1.00   |
| Specificity | 0.76 | 0.86    | 0.96   | 0.98    | 0.96   |

Transcriptomic grades of HG1 and HG3 patients were predicted by five models (GGI, TG-Gene, TG-Iso, SC-Gene and SC-Iso), and compared with histologic grades. Results indicated a high degree of concordance across all methods, but with GGI being most different to the other models. Since the predictions were made by the model built in the same sample, whether statistical learning methods outperform GGI cannot be concluded due to the potential overfitting problem.

## Additional Figure 2

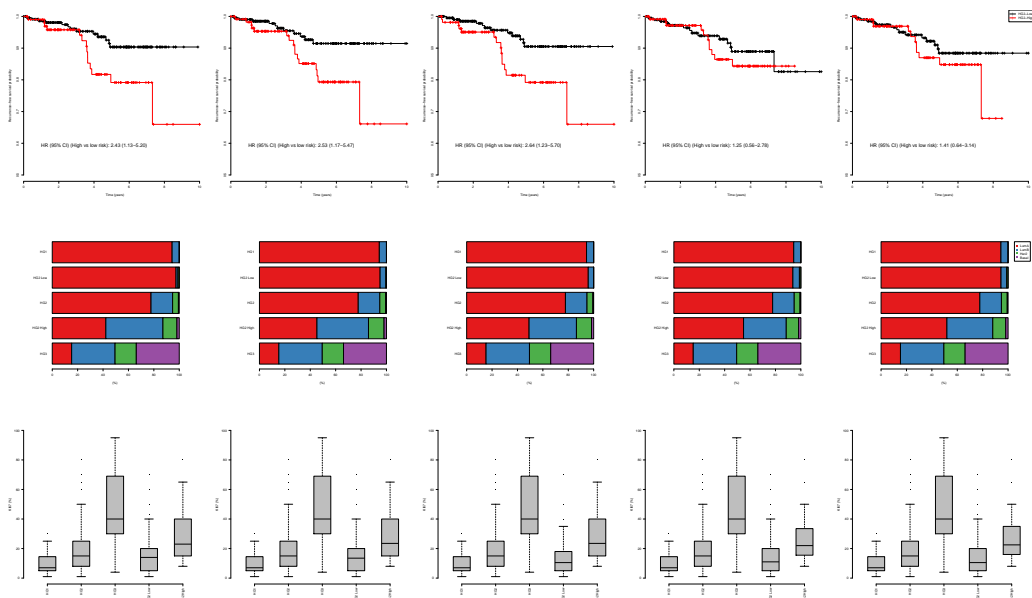

Figures in the first row are recurrence-free Kaplan-Meier curves of HG2-High and HG2-Low groups by five models (GGI, TG-Gene, TG-Iso, SC-Gene, SC-Iso) in patients with histologic grade 2 tumours. Figures in the second row are PAM50 subtypes distribution by five models. Figures in the third row are KI67 distribution by five models. “HG2 Low” and “HG2 High” groups are predicted by five models in patients with histologic grade 2 tumours. Five models from left to right: GGI model, TG-Gene model, TG-Iso model, SC-Gene model and SC-Iso model. Sample from Clinseq and TCGA dataset were combined.

## Additional Figure 3

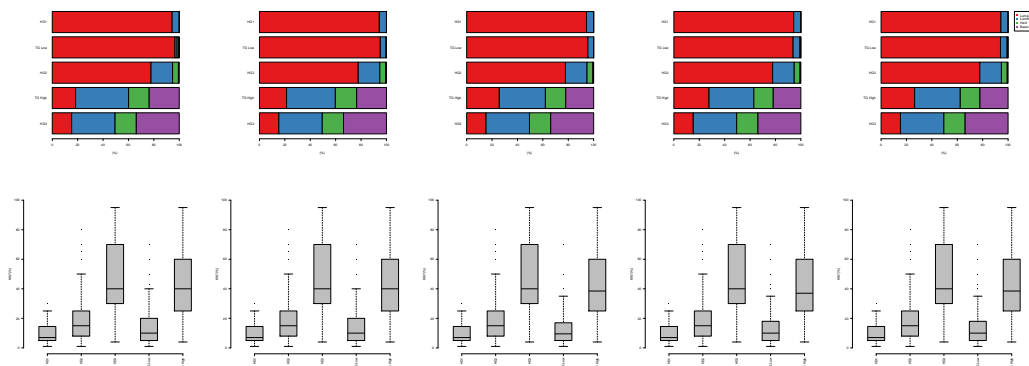

Figures in the first row are PAM50 subtypes distribution by five models (GGI, TG-Gene, TG-Iso, SC-Gene, SC-Iso). TG-High and TG-Low groups were predicted by five models in all the patients from both Clinseq and TCGA datasets. Figures in the second row are KI67 distribution by five models in all the samples from both Clinseq and TCGA datasets. Five models from left to right: GGI model, TG-Gene model, TG-Iso model, SC-Gene model and SC-Iso model. Sample from Clinseq and TCGA dataset were combined.

## Additional Figure 4

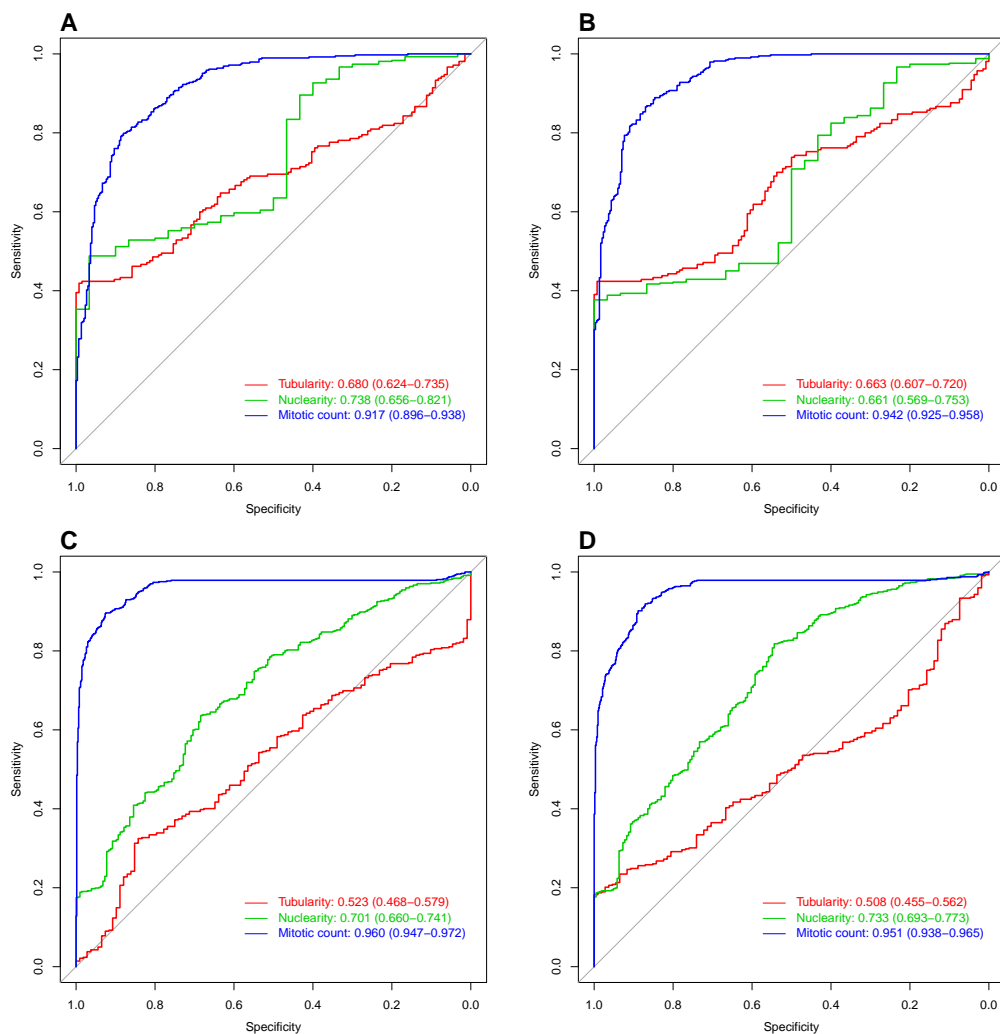

ROC curves of three subcomponents. (A) SC-Gene model in Clinseq dataset; (B) SC-Gene model in TCGA dataset; (C) SC-Iso model in Clinseq dataset; (D) SC-Iso model in TCGA dataset. AUC of ROC curves and 95% CI were listed in each plot.

## Additional Figure 5

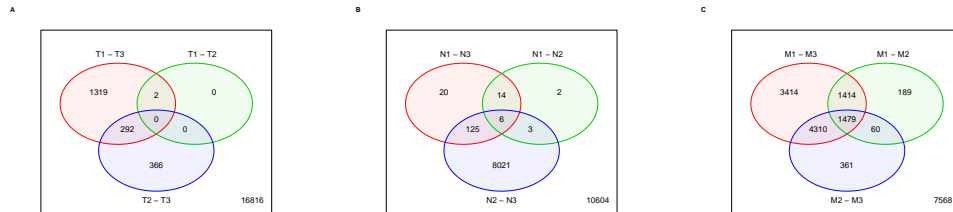

Venn diagram of DE genes for three subcomponents of histologic grade. (A) Tubularity; (B) nuclearity; (C) mitotic counts. Each subcomponent was scored from 1 to 3 according to Nottingham criteria. In each subcomponent, differential expression was analysed among sub-scores.

## Additional Figure 6

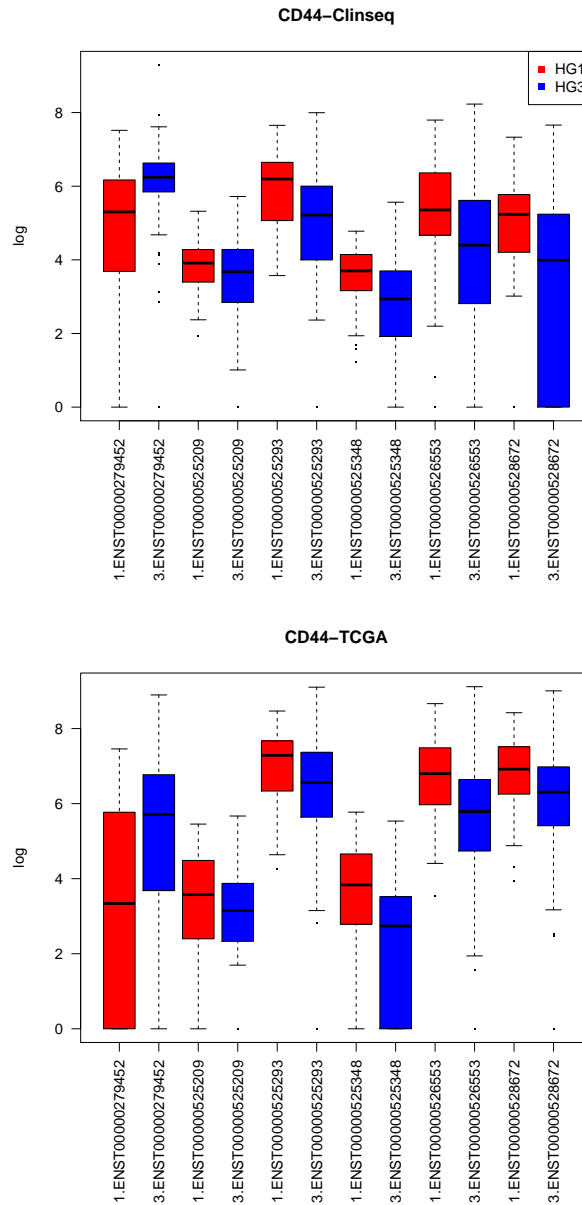

Expression level of CD44 isoforms in Clinseq and TCGA dataset. There were six DE isoforms of gene *CD44* identified in both datasets. The average

expression level in grade 1 tumours was lower than grade 3's in one isoforms (Ensemble transcript ID: ENST00000279452). However, the average expression level of the other five isoforms was higher in HG1 than HG3's.

## Additional Figure 7

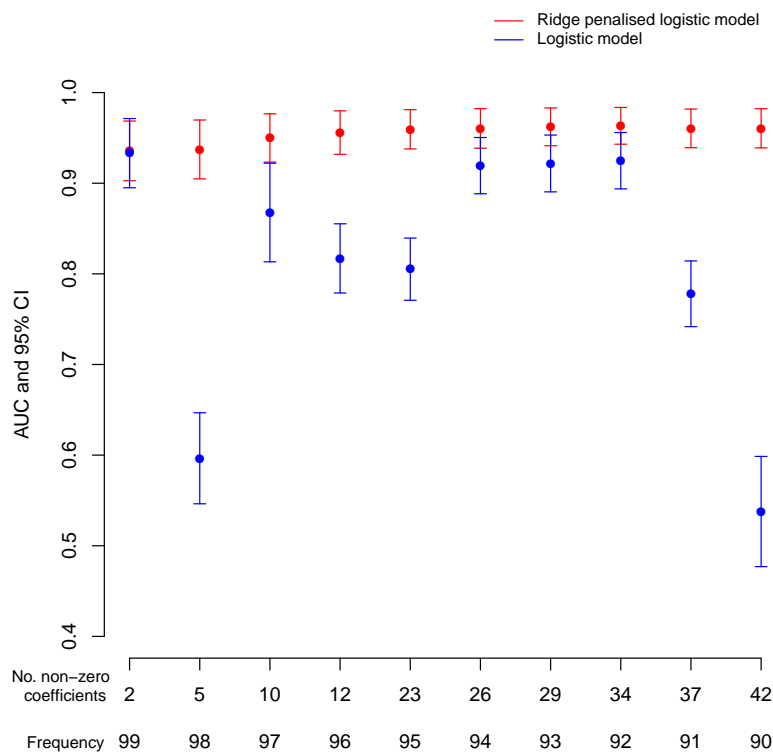

We tested whether the most frequently been selected genes could be utilised as a minimal gene panel. 10 gene sets from genes been selected  $\geq 99$  to  $\geq 90$  rounds of CV were fitted Ridge-penalised logistic regression and regular logistic regression models in Clinseq. Predictions in TCGA dataset were made for each model. AUC and 95% CI of each gene set were plotted in Additional Figure 5. For regular logistic regression model, predictions of models with less than 26 predictors were unstable. Model accuracy dropped when noise introduced by more than 34 predictors. For Ridge-penalised logistic regression model, the highest AUC was achieved when model has 34 genes.



## Additional Figure 8

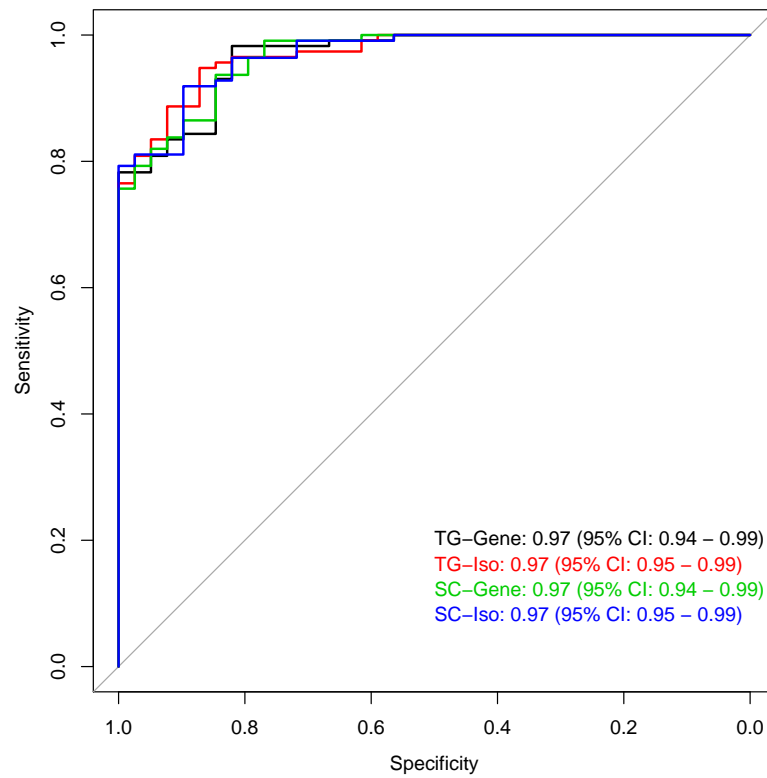

Cross-dataset validation of multivariate prediction models (TG-Gene, TG-Iso, SC-Gene and SC-Iso). Models were estimated based on the TCGA dataset, and grade in the Clinseq dataset was predicted.

## Additional Figure 9

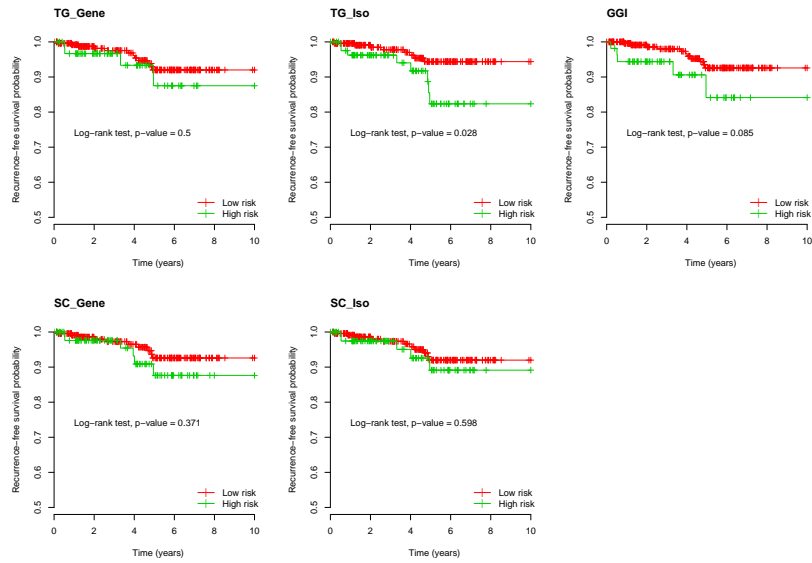

Kaplan-Meier curves of RFS between High and Low risk groups stratified by models (TG-Gene, TG-Iso, GGI, SC-Gene and SC-Iso) within subtype luminal A.

## Additional Figure 10

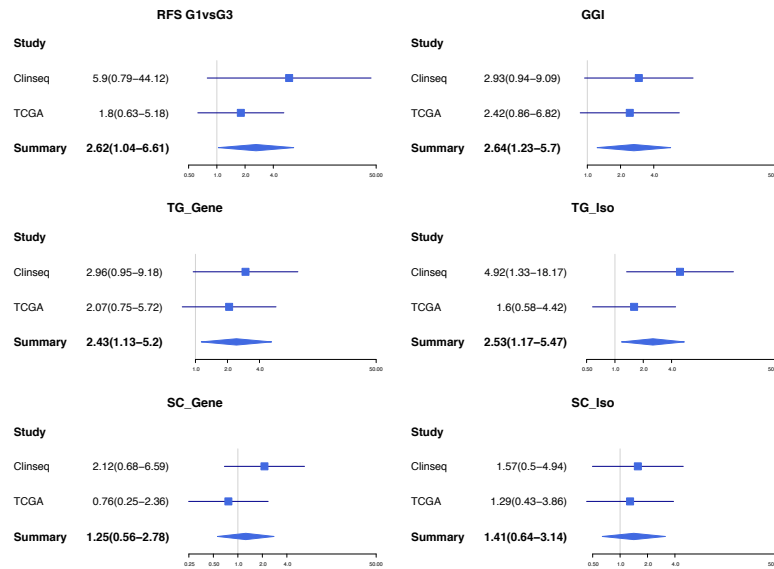

Forest plots of univariate cox-regression model comparing Grade 1 and 3 or predicted High and Low risk group of models (GGI, TG-Gene, TG-Iso, SC-Gene and SC-Iso). The summarised HR was cox regression estimation stratified by dataset, thus allowing for different baseline hazard functions between cohorts.

## Additional Figure 11

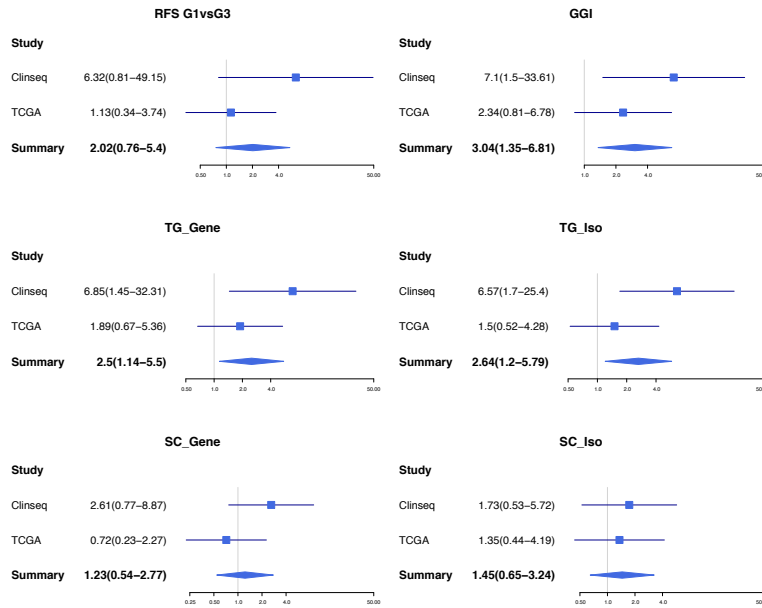

Forest plots of multi-variate cox-regression model comparing Grade 1 and 3 or predicted High and Low risk group of models (GGI, TG-Gene, TG-Iso, SC-Gene and SC-Iso), adjusted for age, tumour size, lymph node status and ER status. The summarised HR was cox regression estimation stratified by dataset, thus allowing for different baseline hazard functions between cohorts.

# Additional Table 1

The top pathways of DE genes in three subcomponents of histologic grade

| Reactome ID           | Pathway                                 | GeneRatio | BgRatio  | pvalue   | p.adjust |
|-----------------------|-----------------------------------------|-----------|----------|----------|----------|
| <b>Tubularity</b>     |                                         |           |          |          |          |
| 1640170               | Cell Cycle                              | 182/668   | 554/6958 | 3.67e-58 | 1.25e-55 |
| 69278                 | Cell Cycle, Mitotic                     | 169/668   | 489/6958 | 2.93e-57 | 5.00e-55 |
| 453277                | Mitotic M-M/G1 phases                   | 123/668   | 346/6958 | 2.61e-42 | 2.97e-40 |
| 68886                 | M Phase                                 | 102/668   | 314/6958 | 4.68e-31 | 4.00e-29 |
| 68877                 | Mitotic Prometaphase                    | 60/668    | 125/6958 | 5.37e-29 | 3.67e-27 |
| 2500257               | Resolution of Sister Chromatid Cohesion | 54/668    | 116/6958 | 2.39e-25 | 1.36e-23 |
| 2555396               | Mitotic Metaphase and Anaphase          | 70/668    | 189/6958 | 3.21e-25 | 1.57e-23 |
| 68882                 | Mitotic Anaphase                        | 69/668    | 188/6958 | 1.35e-24 | 5.77e-23 |
| 2467813               | Separation of Sister Chromatids         | 64/668    | 177/6958 | 1.88e-22 | 7.13e-21 |
| 453279                | Mitotic G1-G1/S phases                  | 52/668    | 133/6958 | 3.50e-20 | 1.20e-18 |
| <b>Nuclearity</b>     |                                         |           |          |          |          |
| 112315                | Transmission across Chemical Synapses   | 6/59      | 196/6958 | 6.03e-03 | 6.03e-02 |
| 112316                | Neuronal System                         | 6/59      | 275/6958 | 2.82e-02 | 1.41e-01 |
| <b>Mitotic counts</b> |                                         |           |          |          |          |
| 69242                 | S Phase                                 | 96/3899   | 118/6958 | 4.51e-09 | 2.49e-06 |
| 453279                | Mitotic G1-G1/S phases                  | 106/3899  | 133/6958 | 6.52e-09 | 2.49e-06 |
| 69239                 | Synthesis of DNA                        | 78/3899   | 93/6958  | 8.94e-09 | 2.49e-06 |
| 1236975               | Antigen processing-Cross presentation   | 65/3899   | 75/6958  | 1.06e-08 | 2.49e-06 |
| 69306                 | DNA Replication                         | 82/3899   | 99/6958  | 1.22e-08 | 2.49e-06 |
| 69206                 | G1/S Transition                         | 87/3899   | 107/6958 | 2.56e-08 | 4.35e-06 |
| 69278                 | Cell Cycle, Mitotic                     | 328/3899  | 489/6958 | 1.57e-07 | 2.29e-05 |
| 1640170               | Cell Cycle                              | 367/3899  | 554/6958 | 2.15e-07 | 2.74e-05 |
| 68874                 | M/G1 Transition                         | 64/3899   | 77/6958  | 3.93e-07 | 4.01e-05 |
| 69002                 | DNA Replication Pre-Initiation          | 64/3899   | 77/6958  | 3.93e-07 | 4.01e-05 |

## Additional Table 2

34 gene list

| ensembl_gene_id | hgnc_symbol | chromosome_name | start_position | end_position | band   | strand |
|-----------------|-------------|-----------------|----------------|--------------|--------|--------|
| ENSG00000083814 | ZNF671      | 19              | 57719751       | 57727624     | q13.43 | -1     |
| ENSG00000198901 | PRC1        | 15              | 90966038       | 90995629     | q26.1  | -1     |
| ENSG00000170312 | CDK1        | 10              | 60778331       | 60794852     | q21.2  | 1      |
| ENSG00000122952 | ZWINT       | 10              | 56357228       | 56361275     | q21.1  | -1     |
| ENSG00000113368 | LMNB1       | 5               | 126776623      | 126837020    | q23.2  | 1      |
| ENSG00000173281 | PPP1R3B     | 8               | 9136255        | 9151574      | p23.1  | -1     |
| ENSG00000088325 | TPX2        | 20              | 31739271       | 31801805     | q11.21 | 1      |
| ENSG00000111206 | FOXM1       | 12              | 2857681        | 2877040      | p13.33 | -1     |
| ENSG00000161800 | RACGAP1     | 12              | 49976923       | 50033136     | q13.12 | -1     |
| ENSG00000104549 | SQLE        | 8               | 124998497      | 125022283    | q24.13 | 1      |
| ENSG00000144182 | LIPT1       | 2               | 99154955       | 99163157     | q11.2  | 1      |
| ENSG00000117724 | CENPF       | 1               | 214603195      | 214664588    | q41    | 1      |
| ENSG00000138160 | KIF11       | 10              | 92593286       | 92655395     | q23.33 | 1      |
| ENSG00000104413 | ESRP1       | 8               | 94641074       | 94707466     | q22.1  | 1      |
| ENSG00000156970 | BUB1B       | 15              | 40161023       | 40221136     | q15.1  | 1      |
| ENSG00000136936 | XPA         | 9               | 97674909       | 97697357     | q22.33 | -1     |
| ENSG00000150938 | CRIM1       | 2               | 36355926       | 36551135     | p22.2  | 1      |
| ENSG00000134057 | CCNB1       | 5               | 69167010       | 69178245     | q13.2  | 1      |
| ENSG00000170959 | DCDC1       | 11              | 30830369       | 31369810     | p13    | -1     |
| ENSG00000237649 | KIFC1       | 6               | 33391536       | 33409924     | p21.32 | 1      |
| ENSG00000099960 | SLC7A4      | 22              | 21028718       | 21032840     | q11.21 | -1     |
| ENSG0000013810  | TACC3       | 4               | 1721490        | 1745176      | p16.3  | 1      |
| ENSG00000129173 | E2F8        | 11              | 19224063       | 19241620     | p15.1  | -1     |
| ENSG00000008311 | AASS        | 7               | 122075647      | 122144280    | q31.32 | -1     |
| ENSG00000112984 | KIF20A      | 5               | 138178719      | 138187715    | q31.2  | 1      |
| ENSG00000006625 | GGCT        | 7               | 30496621       | 30551479     | p14.3  | -1     |
| ENSG00000135094 | SDS         | 12              | 113392445      | 113426301    | q24.13 | -1     |
| ENSG00000257335 | MGAM        | 7               | 141907813      | 142106747    | q34    | 1      |
| ENSG00000135842 | FAM129A     | 1               | 184790724      | 184974550    | q25.3  | -1     |
| ENSG00000101003 | GINS1       | 20              | 25407727       | 25452628     | p11.21 | 1      |
| ENSG00000172748 | ZNF596      | 8               | 232137         | 247342       | p23.3  | 1      |
| ENSG00000126787 | DLGAP5      | 14              | 55148112       | 55191678     | q22.3  | -1     |
| ENSG00000024526 | DEPDC1      | 1               | 68474152       | 68497221     | p31.3  | -1     |
| ENSG00000135476 | ESPL1       | 12              | 53268299       | 53293643     | q13.13 | 1      |

## Additional Table 3

P-value of Log-rank test and HRs of cox-regression on recurrence-free survival comparing breast cancer patients with different histologic grades and predicted groups in grade 2 tumours in Clinseq dataset

| Clinseq                  | N   | Events | Log-rank test<br>p-value | HR unadjusted†<br>(95% CI) | HR adjusted‡<br>(95% CI) |
|--------------------------|-----|--------|--------------------------|----------------------------|--------------------------|
| <b>Histologic grades</b> |     |        |                          |                            |                          |
| HG1                      | 39  | 1      | 0.049*                   | 1.00 (Reference)           | 1.00 (Reference)         |
| HG3                      | 115 | 19     |                          | 5.90 (0.79-44.12)          | 6.32 (0.81-49.15)        |
| <b>GGI</b>               |     |        |                          |                            |                          |
| Low risk                 | 90  | 6      | 0.051                    | 1.00 (Reference)           | 1.00 (Reference)         |
| High risk                | 31  | 6      |                          | 2.93 (0.94-9.09)           | 7.10 (1.50-33.61)*       |
| <b>TG-Gene</b>           |     |        |                          |                            |                          |
| Low risk                 | 89  | 6      | 0.049*                   | 1.00 (Reference)           | 1.00 (Reference)         |
| High risk                | 32  | 6      |                          | 2.96 (0.95-9.18)           | 6.85 (1.45-32.31)*       |
| <b>TG-Iso</b>            |     |        |                          |                            |                          |
| Low risk                 | 74  | 3      | 0.008*                   | 1.00 (Reference)           | 1.00 (Reference)         |
| High risk                | 47  | 9      |                          | 4.92 (1.33-18.17)*         | 6.57 (1.70-25.40)*       |
| <b>SC-Gene</b>           |     |        |                          |                            |                          |
| Low risk                 | 81  | 6      | 0.183                    | 1.00 (Reference)           | 1.00 (Reference)         |
| High risk                | 40  | 6      |                          | 2.12 (0.68-6.59)           | 2.61 (0.77-8.87)         |
| <b>SC-Iso</b>            |     |        |                          |                            |                          |
| Low risk                 | 82  | 7      | 0.440                    | 1.00 (Reference)           | 1.00 (Reference)         |
| High risk                | 39  | 5      |                          | 1.57 (0.50-4.94)           | 1.73 (0.53-5.72)         |

† HR unadjusted;

‡ HR adjusted for age, tumour size, lymph node status and ER status;

\* p-value < 0.05;

## Additional Table 4

P-value of Log-rank test and HRs of cox-regression on recurrence-free survival comparing breast cancer patients with different histologic grades and predicted groups in grade 2 tumours in TCGA dataset

| TCGA                     | N   | Events | Log-rank test<br>p-value | HR unadjusted†<br>(95% CI) | HR adjusted‡<br>(95% CI) |
|--------------------------|-----|--------|--------------------------|----------------------------|--------------------------|
| <b>Histologic grades</b> |     |        |                          |                            |                          |
| HG1                      | 59  | 5      | 0.268                    | 1.00 (Reference)           | 1.00 (Reference)         |
| HG3                      | 179 | 25     |                          | 1.80 (0.63-5.18)           | 1.13 (0.34-3.74)         |
| <b>GGI</b>               |     |        |                          |                            |                          |
| Low risk                 | 133 | 6      | 0.083                    | 1.00 (Reference)           | 1.00 (Reference)         |
| High risk                | 79  | 9      |                          | 2.42 (0.86-6.82)           | 2.34 (0.81-6.78)         |
| <b>TG-Gene</b>           |     |        |                          |                            |                          |
| Low risk                 | 139 | 7      | 0.150                    | 1.00 (Reference)           | 1.00 (Reference)         |
| High risk                | 73  | 8      |                          | 2.07 (0.75-5.72)           | 1.89 (0.67-5.36)         |
| <b>TG-Iso</b>            |     |        |                          |                            |                          |
| Low risk                 | 142 | 8      | 0.362                    | 1.00 (Reference)           | 1.00 (Reference)         |
| High risk                | 70  | 7      |                          | 1.6 (0.58-4.42)            | 1.5 (0.52-4.28)          |
| <b>SC-Gene</b>           |     |        |                          |                            |                          |
| Low risk                 | 117 | 8      | 0.640                    | 1.00 (Reference)           | 1.00 (Reference)         |
| High risk                | 77  | 5      |                          | 0.76 (0.25-2.36)           | 0.72 (0.23-2.27)         |
| <b>SC-Iso</b>            |     |        |                          |                            |                          |
| Low risk                 | 126 | 7      | 0.652                    | 1.00 (Reference)           | 1.00 (Reference)         |
| High risk                | 68  | 6      |                          | 1.29 (0.43-3.86)           | 1.35 (0.44-4.19)         |

† HR unadjusted;

‡ HR adjusted for age, tumour size, lymph node status and ER status;

\* p-value < 0.05;
